# Supplementary material for: Determinants of COVID-19 Vaccine Acceptability among Healthcare Workers in Kenya—A Mixed Methods Analysis
Source: MDPI journal article supplement (doi:10.3390/vaccines11081290), 2023-07-27
Supplement: s1 [file s1]

Table S1: 3C Model Construct Questions and those Dropped by Exploratory Factor Analysis.

| Constructs  | Question Items                                                                                                                           | Remarks |
|-------------|------------------------------------------------------------------------------------------------------------------------------------------|---------|
| Confidence  | I am completely confident that COVID-19 vaccines are safe.                                                                               |         |
|             | I am confident that decisions regarding COVID-19 vaccination by public authorities (NPHCDA) is in the best interest of the community.    |         |
|             | I am confident that decisions regarding COVID-19 vaccination by the Federal Government is in the best interest of the community.         |         |
|             | COVID-19 vaccines are effective.                                                                                                         |         |
|             | Medicines do more harm than good.                                                                                                        | Dropped |
| Convenience | Everyday stress prevents me from being vaccinated.                                                                                       |         |
|             | The vaccination sites are too far from me.                                                                                               |         |
|             | The process of getting vaccinated is too stressful for me.                                                                               |         |
|             | I don't have time off work to get vaccinated.                                                                                            |         |
| Complacency | My immune system is so strong; it protects me against COVID-19 and I don't need to be vaccinated.                                        |         |
|             | COVID-19 is not so severe that I should be vaccinated.                                                                                   |         |
|             | How likely is it that you are going to buy/use a recreational drug.                                                                      |         |
|             | I think it is important to take warnings about negative outcomes seriously, even if the negative outcomes will not occur for many years. | Dropped |
|             | I only act to satisfy immediate concerns, figuring that the future will take care of itself.                                             | Dropped |
|             | I only act to satisfy immediate concerns, figuring that the future will take care of itself.                                             | Dropped |
